# Supplementary material for: High-Throughput Drug Screening Revealed That Ciclopirox Olamine Can Engender Gastric Cancer Stem-like Cells
Source: MDPI journal article supplement (doi:10.3390/cancers15174406), 2023-09-03

## Supplementary Materials

# High-Throughput Drug Screening Revealed That Ciclopinox Olamine Can Engender Gastric Cancer Stem-like Cells

**Table S1:** Primers used for real-time PCR analysis

| Gene      | Primer Forward (5' → 3') | Primer Reverse (5' → 3') |
|-----------|--------------------------|--------------------------|
| ARNT2     | AAGAACCGGGAGTGATGTTG     | CTGTTGCTGAAGTTGCTTGACG   |
| β-catenin | CAATGGCTTGAATGAGACTGC    | GGATCATCCTGGTGATATCCAAG  |
| c-Jun     | AGTGAGTGACCGCGACTTTT     | GATGCCTCCCGCACTCTTAC     |
| C-MYC     | GCGACTCTGAGGAGGAACAAG    | TGGGCTGTGAGGAGGTTTG      |
| CNOT3     | GGCTCACGAATACCATCGACA    | GCTTATCCTGTGCGCCCTCT     |
| FOXA1     | AAGGGCATGAAACCAGCGAC     | GCCTGAGTTCATGTTGCTGAC    |
| FOXA2     | ATGCACTCGGCTTCCAGTAT     | GTTGCTCACGGAGGAGTAGC     |
| FOXC2     | CTACAGCTACATCGCGCTCATCA  | ACTGGTAGATGCCGTTCAAGGTG  |
| GATA6     | AAGCGCGTGCCTTCATCA       | CATAGCAAGTGGTCTGGGCA     |
| GLI1      | GAAGTCATACTACGCCTCGAA    | CAGCCAGGGAGCTTACATACAT   |
| GLI2      | AGCAGCAGCAACTGTCTGAGTGA  | GACCTTGCTGCGCTTGTGAA     |
| Hes1      | ACACGACACCGGATAAAACCA    | ATGCCGCGAGCTATCTTTCT     |
| HIF-1α    | GGCGCGAACGACAAGAAAAAGATA | GGCCTTATCAAGATGCGAACTCAC |
| HMGA1     | GTGCCAACACCTAAGAGACCT    | TCTGCTGGTTTTCCGGCTC      |
| HMGA2     | CCCAAAGGCAGCAAAAACAA     | GCCTCTTGCCGTTTTTCTC      |
| HOXA10    | CCCTTCGAGAGCAGCAAA       | TCTTCGACCACTCTTTGCC      |
| HOXA5     | GCGCAAGCTGCACATAAGTC     | CGGAGAGGCAAAGAGCATGT     |
| ISL1      | CTGCTTTTCAGCAACTGGTCA    | TAGGACTGGCTACCATGCTGT    |
| KLF4      | CAGAGGAGCCCAAGCCAAAG     | TTTCTCACCTGTGTGGGTTCG    |
| KLF5      | AAGGAGTAACCCCGATTGG      | CAGCCTTCCCAGGTACACTT     |
| MEIS2     | TCCAGCATCTCACACATCCG     | GAAAACCTGCTCGATTGACTGG   |
| NANOG     | GAACCTCAGCTACAAACAGGTGAA | TTCTGCGTCACACCATTGCT     |
| OCT1      | CAAAATGGCGGACGGAGGA      | GTTTATTCTTGAGTCTGCTGCTG  |
| OCT4      | TGCAGCAGATCAGCCACAT      | ACACTGGTCCCCCTGAGAAA     |
| RelA      | GCTGCATCCACAGTTTCCAGA    | CCCCACGCTGCTCTTCTAT      |
| SOX4      | GACTTCGAGTTTGCTCCCT      | TAACTCGCCTTCTTGCTGGG     |
| SOX9      | CGGAGGAAGTCGGTGAAG       | CTGGGATTGCCCCGAGTGCT     |

|        |                       |                        |
|--------|-----------------------|------------------------|
| STAT3  | GAGGACTGAGCATCGAGCA   | CATGTGATCTGACACCCTGAA  |
| TCF4   | TTTGAAGAAGCGGCCAAGAGG | TTGGGGAGGTAGGGGCTCGT   |
| TEAD2  | TTTGGGGTGTGCCAGATG    | TCCTCACTGCCTTCTCACT    |
| ZNF273 | AGCCTAGAAATGGGACCACTG | GCTGTGAAGTGCCAGGCAT    |
| 18S    | CGCCGCTAGAGGTGAAATTC  | CATTCTTGGCAAATGCTTTTCG |

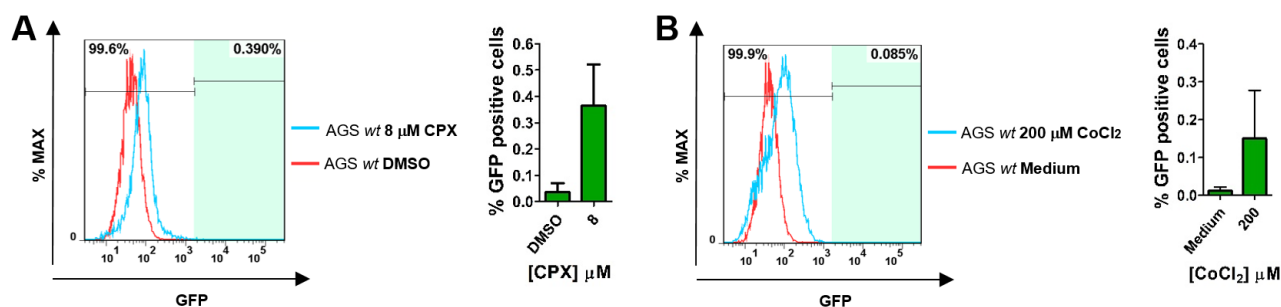

**Figure S1: Evaluation of the percentage of GFP positive cells by flow cytometry.** Flow cytometry analysis of GFP expression in AGS wt cells (**A**) after 48 h of treatment with 8  $\mu$ M CPX and (**B**) after 48 h of treatment with 200  $\mu$ M CoCl<sub>2</sub>. wt corresponds to the parental cell line (AGS). DMSO or medium were used as a negative control. Results are mean  $\pm$  SD of at least three independent experiments.

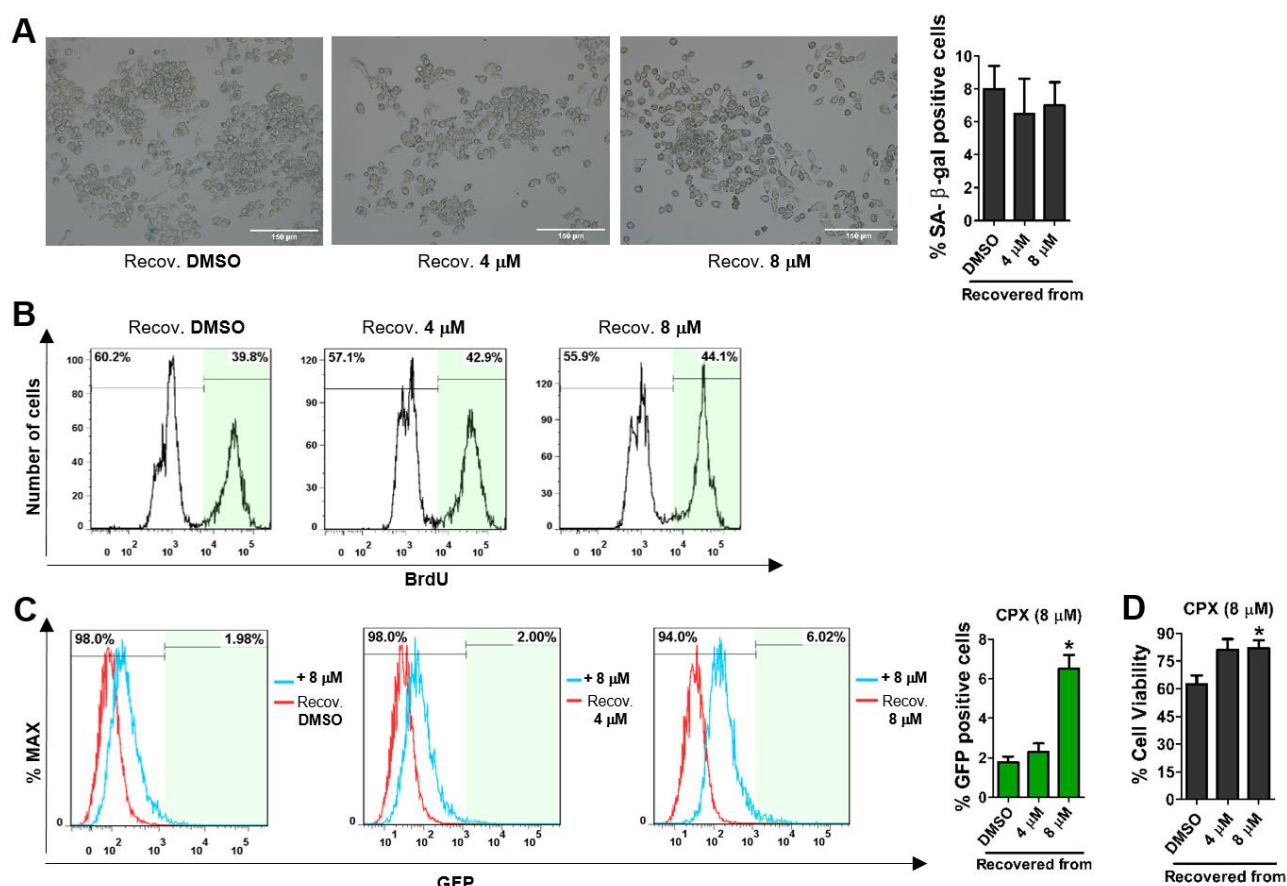

**Figure S2: CPX-induced cellular senescence is reversible and cells regain the proliferative ability.** (A) Percentage of SA- $\beta$ -gal positive cells in Kato III SORE6<sup>-</sup> cells 4 weeks after recovery from treatment with DMSO, 4 or 8  $\mu$ M CPX for 48 h, following representative images of SA- $\beta$ -gal marking. Scale bar = 150  $\mu$ m. (B) Representative flow cytometry analysis of the percentage of BrdU positive cells in AGS SORE6<sup>-</sup> cells 4 weeks after recovery from treatment with DMSO, 4 or 8  $\mu$ M CPX for 48 h. (C) Percentage of cell viability after 48 h of treatment of AGS SORE6<sup>-</sup> and Kato III SORE6<sup>-</sup> recovered cells with 4.5  $\mu$ g/mL (IC<sub>50</sub>) of 5-FU. (D) Percentage of GFP-positive cells, following the respective flow cytometry analysis, and (E) cell viability in Kato III SORE6<sup>-</sup> recovered cells after new treatment with 8  $\mu$ M CPX for 48 h. DMSO was used as a negative control. Results are mean  $\pm$  SD of at least three independent experiments. Significant differences \*  $p \leq 0.05$ .

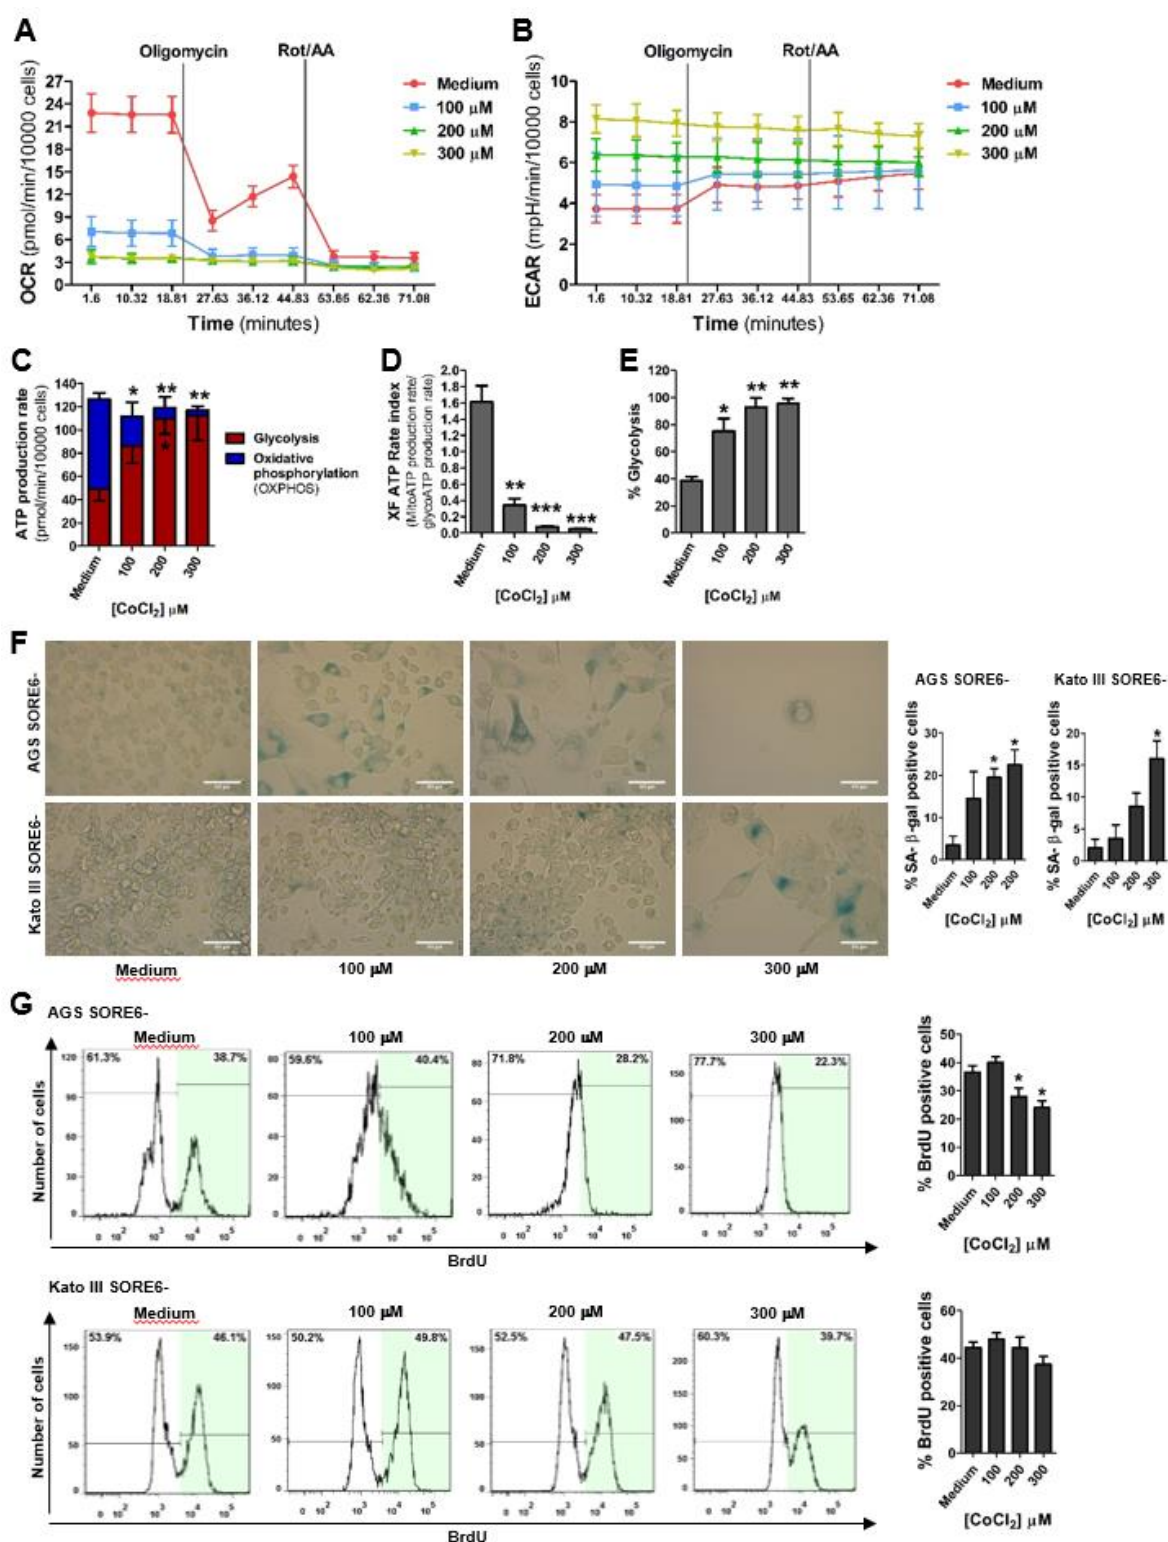

**Figure S3: CoCl<sub>2</sub> treatment inhibits ATP production by OXPHOS and induces cellular senescence with consequent loss of proliferative activity.** (A) Representative real-time measurements of the kinetic profile of the OCR, (B) representative real-time measurements of the kinetic profile of the ECAR, (C) metabolic flux analysis showing quantification of mitochondrial ATP production and glycolytic ATP production, (D) ATP production rate index calculated from the data showed in H (i.e., mitochondrial ATP production rate/glycolytic ATP production rate) and (E) percentage of glycolysis following treatment with 100, 200 or 300  $\mu$ M CoCl<sub>2</sub> for 48 h. (F) Percentage of SA- $\beta$ -gal positive cells in AGS SORE6- and Kato III SORE6- cells treated with 100, 200 or 300  $\mu$ M CoCl<sub>2</sub> for 48 h, followed by representative images of SA- $\beta$ -gal marking. Scale bar = 150  $\mu$ m. (G) Percentage of

BrdU positive cells in AGS SORE6<sup>+</sup> and Kato III SORE6<sup>+</sup> cells treated with 100, 200 or 300  $\mu$ M CoCl<sub>2</sub> for 48 h, followed by representative flow cytometry analysis. Medium was used as a negative control. Results are mean  $\pm$  SD of at least three independent experiments. \*  $p \leq 0.05$ ; \*\*  $p \leq 0.01$ ; \*\*\*  $p \leq 0.001$ .

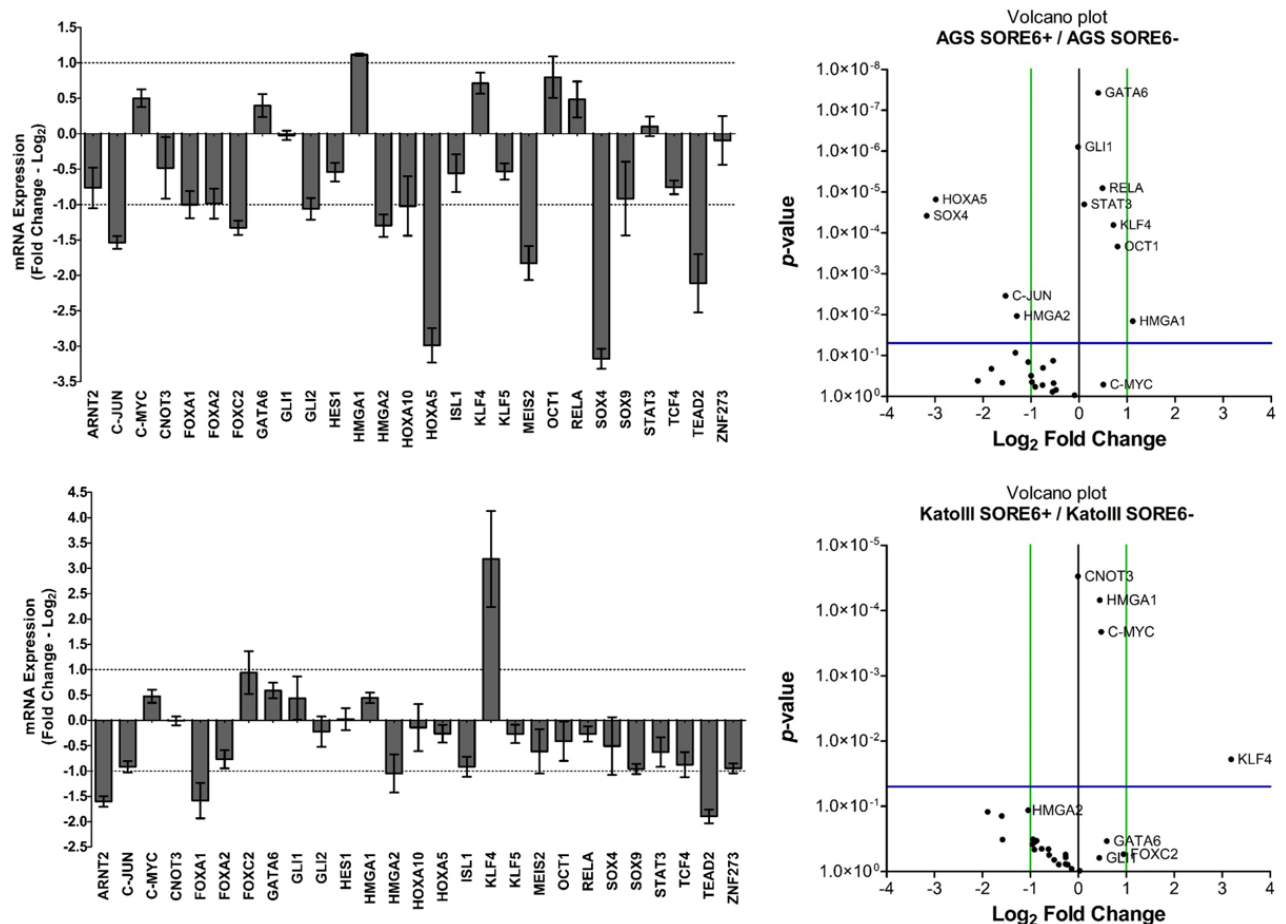

**Figure S4: Comparison of the expression of relevant transcription factors between SORE6<sup>+</sup> and SORE6<sup>-</sup> cells.** Real-time PCR analysis of mRNA levels of the transcription factors ARNT2, C-JUN, C-MYC, CNOT3, FOXA1, FOXA2, FOXC2, GATA6, GLI1, GLI2, HES1, HMGA1, HMGA2, HOXA10, HOXA5, ISL1, KLF4, KLF5, MEIS2, OCT1, RELA, SOX4, SOX9, STAT3, TCF4, TEAD2 and ZNF273 in AGS SORE6<sup>+</sup> and Kato III SORE6<sup>+</sup> cells in comparison to AGS SORE6<sup>-</sup> and Kato III SORE6<sup>-</sup> cells. Followed by the volcano plot (SORE6<sup>+</sup> compared to SORE6<sup>-</sup> cells) where the horizontal blue line represents the threshold of statistical significance ( $p = 0.05$ ) and the green lines corresponds to the fold change cut-off  $\geq 2$ . Results were normalized to 18S expression. Results are mean  $\pm$  SD of at least three independent experiments.

UNCROPPED WESTERN BLOT FIGURES

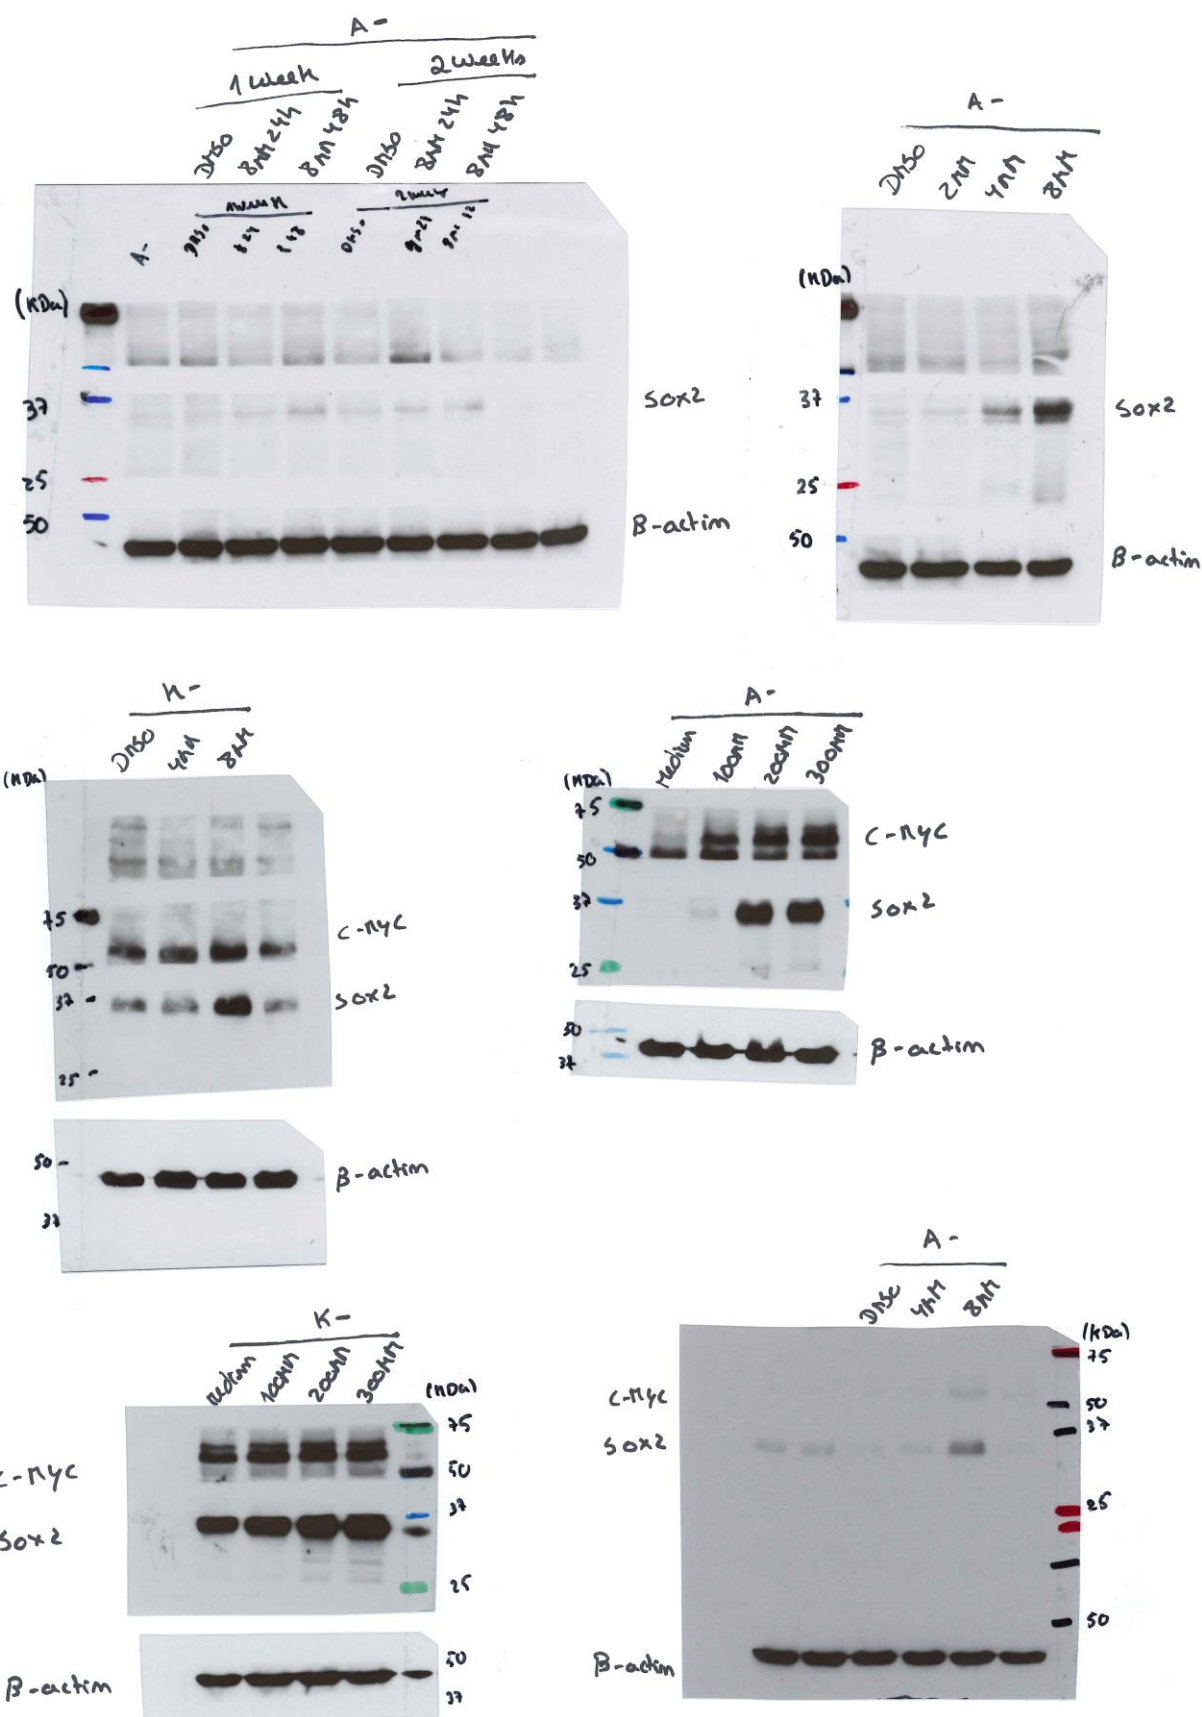

Supplement: s1 [file s1]
